# Supplementary material
Source: publisher figshare collection journal article supplement (https://geolsoc.figshare.com/ndownloader/files/13548458)
Supplement: Supplementary file 1 [file 13548458]

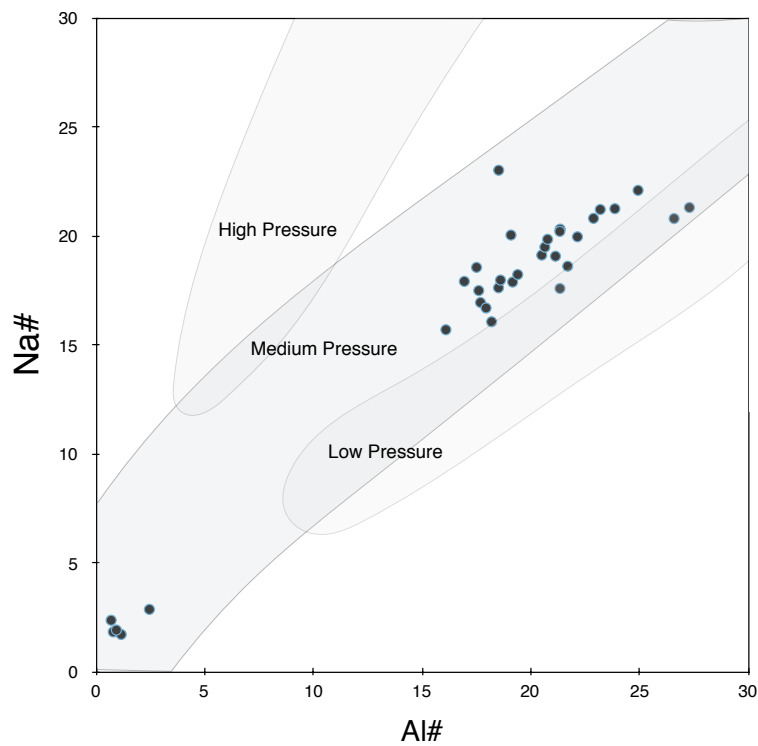

Normalization scheme after Leake et al 1997; high, medium, and low pressure fields after Laird & Albee 1981.

Laird, J. & Albee, A.L. 1981. Pressure, temperature, and time indicators in mafic schist; their application to reconstructing the polymetamorphic history of Vermont. *American Journal of Science*, 281, 127–175, <https://doi.org/10.2475/ajs.281.2.127>

Leake, B.E., Woolley, A.R., et al. 1997. Nomenclature of Amphiboles: Report of the Subcommittee of the International Commission on New Minerals and Mineral Names. *The Canadian Mineralogist*, 35, 219–246, <https://doi.org/10.1180/minmag.1997.061.405.13>.
